# Supplementary material
Source: PubMed Central journal article supplement (PMC539724)

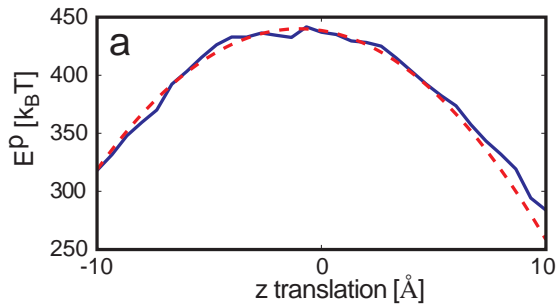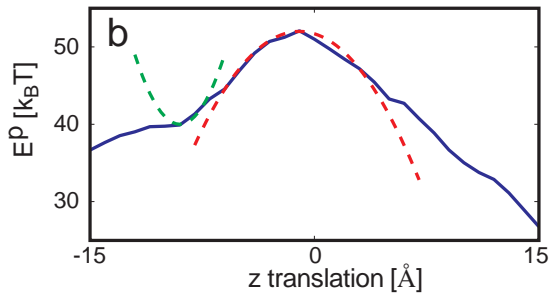

Supplement: pnas_101_51_17640__2.pdf [file pnas_101_51_17640__2.pdf]
